# Supplementary material
Source: PubMed Central journal article supplement (PMC7030824)

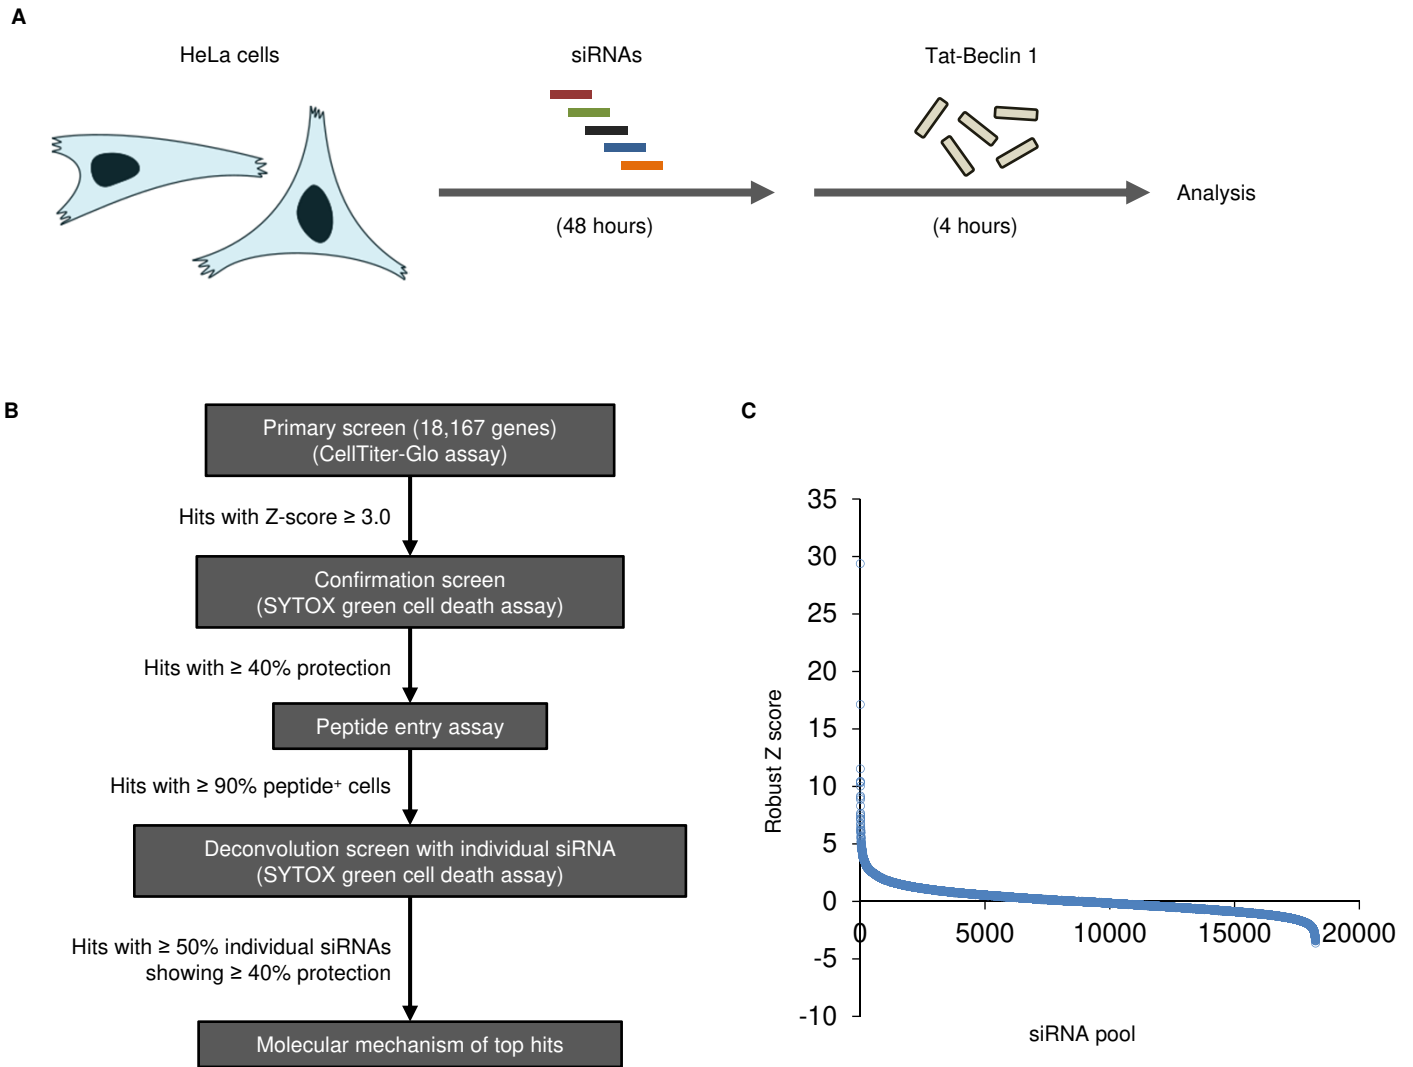

**Supplemental Figure 1. Identification of autosis regulators in a genome-wide siRNA screen.** (A, B), Schematic diagrams of genome-wide siRNA screening for regulators of Tat-Beclin 1-induced autosis. See Methods for details. (C), Ranked distribution of z-score averages for each siRNA pool in primary genome-wide siRNA screen. See Supplemental Table 1 for top hits from primary screen, Supplemental Table 2 for top hits from conformational screen and Supplemental Table 3 for top hits from the final deconvolution screen. All assays were performed in triplicate.

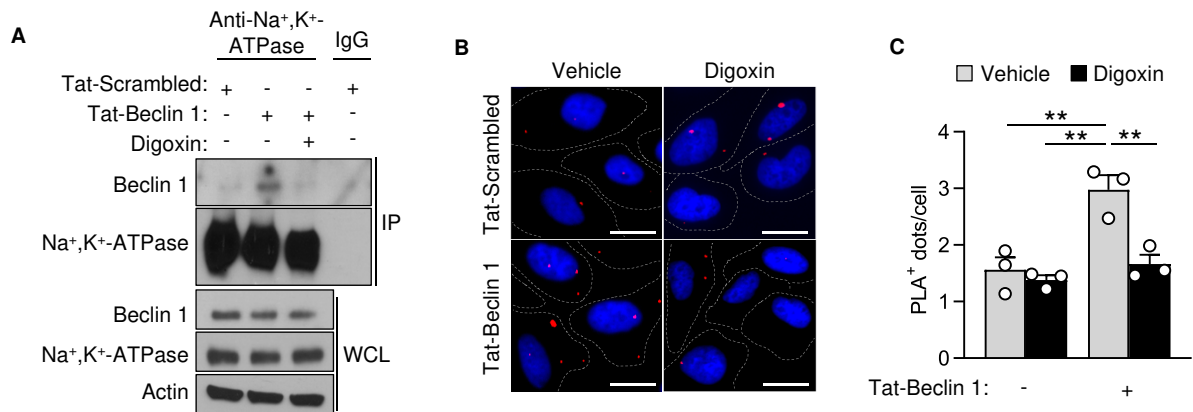

**Supplemental Figure 2. Beclin 1 and Na<sup>+</sup>,K<sup>+</sup>-ATPase interact during autophagy-inducing peptide treatment.** (A) Co-immunoprecipitation of Beclin 1 with the  $\alpha$ -subunit of Na<sup>+</sup>,K<sup>+</sup>-ATPase in HeLa cells after 3 hours of treatment with Tat-Scrambled peptide or Tat-Beclin 1 active peptide supplemented with either vehicle or 10  $\mu$ M digoxin. The same cell lysate from cells treated with Tat-Scrambled peptide was used as a control for IgG immunoprecipitation. Similar results were observed in three independent experiments. (B, C) Representative images (B) and quantitation (C) of proximity ligase assay (PLA) of Beclin 1 and the  $\alpha$ -subunit of Na<sup>+</sup>,K<sup>+</sup>-ATPase in the indicated conditions. In (C) mean values  $\pm$  SEM from three independent experiments (value for each experiment represent mean value of at least 100 cells per condition). Scale bars, 10  $\mu$ m. \*\* $P < 0.01$ , Two-way ANOVA test.

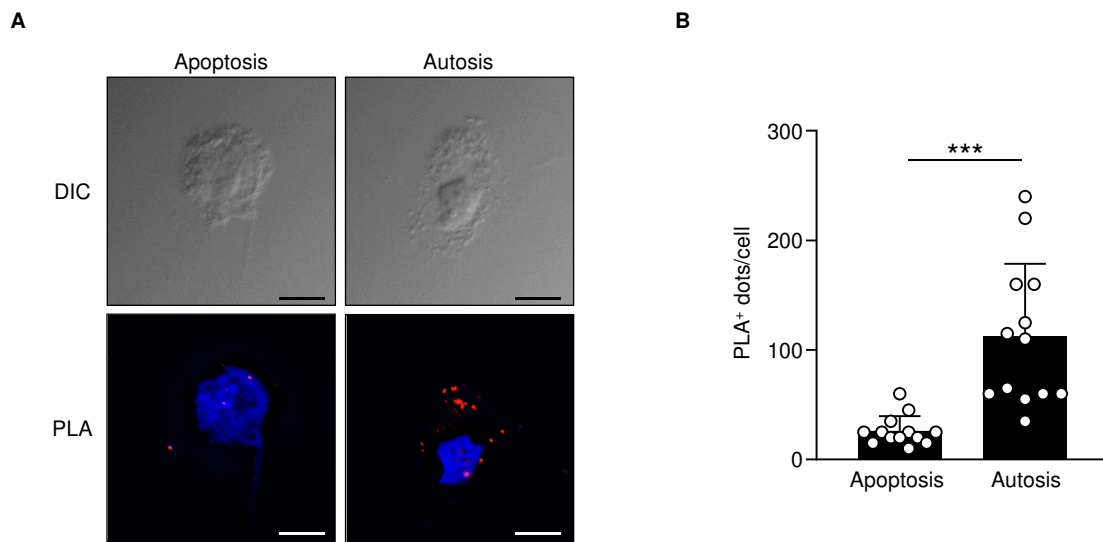

**Supplemental Figure 3. Increased interaction between Beclin 1 and Na<sup>+</sup>,K<sup>+</sup>-ATPase during autosis but not apoptosis.** (A) Representative images of differential interference contrast (DIC) microscopy and proximity ligation assays (PLA) of Beclin 1 and Na<sup>+</sup>,K<sup>+</sup>-ATPase in apoptotic and autotic-like HeLa cells after 24 hours of starvation. Apoptotic cells were defined as those cells with rounded morphology and cytoplasmic and cell surface blebbing. Autotic-like cells were defined as cells with perinuclear ballooning. (B), Quantitation of (A). Bars represent mean  $\pm$  SD (n = 13 cells per condition). \*\*\**P* < 0.001; Two-tailed unpaired Student's t-test.

**Supplemental Table 1: Top hits from primary screen**

| Symbol                 | Name                                                                | Function                                              | Average Z-scores |
|------------------------|---------------------------------------------------------------------|-------------------------------------------------------|------------------|
| <i>ATP1A1</i>          | ATPase Na <sup>+</sup> /K <sup>+</sup> transporting subunit alpha 1 | Component of ion pump                                 | 25.151           |
| <i>TRIM25</i>          | tripartite motif containing 25                                      | E3 ubiquitin ligase in immunity                       | 17.780           |
| <i>ZNF185</i>          | zinc finger protein 185 with LIM domain                             | Cytoskeleton dynamics                                 | 11.798           |
| <i>RFWD3</i>           | ring finger and WD repeat domain 3                                  | E3 ubiquitin ligase in DNA repair                     | 10.259           |
| <i>WFDC1</i>           | WAP four-disulfide core domain 1                                    | Control of stromal-epithelial interaction             | 10.250           |
| <i>KCNN4</i>           | potassium calcium-activated channel subfamily N member 4            | Component of ion channel                              | 9.090            |
| <i>SOAT2</i>           | sterol O-acyltransferase 2                                          | Acyl-CoA:cholesterol acyltransferase                  | 9.044            |
| <i>RNASET2</i>         | ribonuclease T2                                                     | Lysosomal degradation of RNA                          | 8.566            |
| <i>ACP5</i>            | acid phosphatase type 5. tartrate resistant                         | Dephosphorylation of osteopontin                      | 8.380            |
| <i>KCNQ2</i>           | potassium voltage-gated channel subfamily Q member 2                | Component of ion channel                              | 8.120            |
| <i>SAMD4</i>           | sterile alpha motif domain containing 4                             | RNA-binding post-transcriptional regulator            | 8.054            |
| <i>TMEM132E</i>        | transmembrane protein 132E                                          | Cellular adhesion                                     | 7.837            |
| <i>PPFIA3</i>          | PTPRF interacting protein alpha 3                                   | Regulation of focal adhesions                         | 7.370            |
| <i>AIRE</i>            | autoimmune regulator                                                | Transcription factor in T cell negative selection     | 7.324            |
| <i>TRIM46</i>          | tripartite motif containing 46                                      | Microtubule organization in neuronal polarization     | 7.095            |
| <i>MEX3B</i>           | mex-3 RNA binding family member B                                   | RNA-binding post-transcriptional regulator            | 7.053            |
| <i>ECEL1</i>           | endothelin converting enzyme like 1                                 | Endopeptidase in regulation of neuropeptides          | 6.865            |
| <i>MRPL22</i>          | mitochondrial ribosomal protein L22                                 | Mitochondrial protein synthesis                       | 6.790            |
| <i>IFNAR1</i>          | Interferon alpha and beta receptor subunit 1                        | Receptor for IFN-alpha and IFN-beta                   | 6.787            |
| <i>PTPNS1 (SIRPA)</i>  | signal regulatory protein alpha                                     | Inhibitory receptor of CD47                           | 6.769            |
| <i>PVRL4 (NECTIN4)</i> | nectin cell adhesion molecule 4                                     | Regulation of cadherin-based adherens junctions       | 6.750            |
| <i>PPP1R14A</i>        | protein phosphatase 1 regulatory inhibitor subunit 14A              | Smooth muscle contraction                             | 6.578            |
| <i>PABPC1</i>          | poly(A) binding protein cytoplasmic 1                               | mRNA regulation                                       | 6.412            |
| <i>SYS1</i>            | SYS1 golgi trafficking protein                                      | Targeting of ARFRP1 to the Golgi apparatus            | 6.264            |
| <i>AQP2</i>            | aquaporin 2                                                         | Renal water homeostasis                               | 5.919            |
| <i>SSX6</i>            | SSX family member 6. pseudogene                                     | Probable transcriptional repressor                    | 5.867            |
| <i>HECTD1</i>          | HECT domain E3 ubiquitin protein ligase 1                           | E3 ubiquitin ligase in different processes            | 5.712            |
| <i>LDAH</i>            | lipid droplet associated hydrolase                                  | Lipid hydrolase involved in triacylglycerol dynamics  | 5.599            |
| <i>PTPRN2</i>          | protein tyrosine phosphatase receptor N2                            | Phosphatidylinositol phosphatase in insulin secretion | 5.531            |
| <i>RAB40AL</i>         | RAB40A like                                                         | Protein targeting for proteasomal degradation         | 5.498            |
| <i>TRAF3</i>           | TNF receptor associated factor 3                                    | Signal transducer of different immune receptors       | 5.465            |
| <i>MIB1</i>            | mindbomb E3 ubiquitin protein ligase 1                              | E3 ubiquitin ligase in different processes            | 5.259            |
| <i>G3BP1</i>           | GRBP stress granule assembly factor 1                               | Helicase in DNA sensing; stress granule assembly      | 5.239            |
| <i>SSX2</i>            | SSX family member 2                                                 | Probable transcriptional repressor                    | 5.218            |
| <i>TRIM56</i>          | tripartite motif containing protein 56                              | E3 ubiquitin ligase in immunity                       | 5.164            |
| <i>COQ10B</i>          | coenzyme Q10B                                                       | Coenzyme Q chaperone                                  | 5.161            |
| <i>ZFH4</i>            | zinc finger homeobox 4                                              | Transcription factor in neural cell differentiation   | 5.117            |
| <i>ZNF278 (PATZ1)</i>  | POZ/BTB and AT hook containing zinc finger 1                        | Transcriptional repressor                             | 5.111            |
| <i>CCNE2</i>           | cyclin-E2                                                           | Cell cycle regulation                                 | 5.022            |

**Supplemental Table 2: Top hits from confirmation screen**

| <b>Symbol</b>                         | <b>Name</b>                                                         | <b>Function</b>                                                      | <b>Cell death protection (%)</b> |
|---------------------------------------|---------------------------------------------------------------------|----------------------------------------------------------------------|----------------------------------|
| <i>ATP1A1</i>                         | ATPase Na <sup>+</sup> /K <sup>+</sup> transporting subunit alpha 1 | Component of ion pump                                                | 118.27%                          |
| <i>HIST1H2AI</i><br>( <i>H2AC13</i> ) | H2A clustered histone 13                                            | Core component of nucleosome                                         | 106.19%                          |
| <i>CBX1</i>                           | chromobox 1                                                         | Epigenetic repression in heterochromatin                             | 103.03%                          |
| <i>IGSF9</i>                          | Immunoglobulin superfamily 9                                        | Cell adhesion molecule in synapses                                   | 92.01%                           |
| <i>STAU2</i>                          | staufen double-stranded RNA binding protein 2                       | mRNA transport in heart and brain                                    | 88.52%                           |
| <i>ARSI</i>                           | arylsulfatase family member I                                       | Hydrolysis of sulfate esters                                         | 87.42%                           |
| <i>FLJ40142</i>                       | Unknown                                                             | Unknown                                                              | 87.10%                           |
| <i>RNASET2</i>                        | ribonuclease T2                                                     | Lysosomal degradation of RNA                                         | 87.00%                           |
| <i>SYT9</i>                           | synaptotagmin 9                                                     | Ca <sup>2+</sup> -dependent exocytosis                               | 85.77%                           |
| <i>WFDC1</i>                          | WAP four disulfide core domain 1                                    | Control of stromal-epithelial interaction                            | 82.88%                           |
| <i>SAMD4</i>                          | sterile alpha motif domain containing 4                             | RNA-binding post-transcriptional regulator                           | 80.78%                           |
| <i>SYS1</i>                           | SYS1 golgi trafficking protein                                      | Targeting of ARFRP1 to the Golgi apparatus                           | 80.41%                           |
| <i>TRIM25</i>                         | tripartite motif containing 25                                      | E3 ubiquitin ligase in immunity                                      | 80.12%                           |
| <i>ATP2B2</i>                         | ATPase plasma membrane Ca <sup>2+</sup> transporting 2              | Transport of calcium                                                 | 71.78%                           |
| <i>EVPL</i>                           | evnoplakin                                                          | Cytoskeletal linker protein                                          | 69.27%                           |
| <i>PPFIA3</i>                         | PTPRF interacting protein alpha 3                                   | Regulation of focal adhesions                                        | 68.84%                           |
| <i>SLC6A8</i>                         | solute carrier family 6 member 8                                    | Creatine transporter                                                 | 66.42%                           |
| <i>THBS3</i>                          | thrombospondin 3                                                    | Cell-to-cell. cell-to-matrix interactions                            | 65.17%                           |
| <i>TRPT1</i>                          | tRNA phosphotransferase 1                                           | tRNA splicing                                                        | 64.27%                           |
| <i>TMEM132E</i>                       | transmembrane protein 132E                                          | Cellular adhesion                                                    | 63.60%                           |
| <i>HIST1H2BL</i><br>( <i>H2BC13</i> ) | H2B clustered histone 13                                            | Core component of nucleosome                                         | 63.34%                           |
| <i>SLC22A5</i>                        | solute carrier family 22 member 5                                   | Carnitine transporter                                                | 61.85%                           |
| <i>MRPL22</i>                         | mitochondrial ribosomal protein L22                                 | Mitochondrial protein synthesis                                      | 60.55%                           |
| <i>RAB40L</i>                         | RAB40A                                                              | Protein targeting for proteasomal degradation                        | 60.48%                           |
| <i>AQP2</i>                           | aquaporin-2                                                         | Renal water homeostasis                                              | 57.45%                           |
| <i>PGLYRP3</i>                        | peptidoglycan recognition protein 3                                 | Antimicrobial peptide                                                | 57.28%                           |
| <i>VPS28</i>                          | VPS28 subunit of ESCRT-I                                            | Vesicular trafficking                                                | 55.45%                           |
| <i>HES2</i>                           | hes family bHLH transcription factor 2                              | Transcriptional repressor                                            | 54.81%                           |
| <i>NFKBIZ</i>                         | NFKB inhibitor zeta                                                 | Nuclear inhibitor of NF-κB                                           | 54.57%                           |
| <i>PPP1R3A</i>                        | protein phosphatase 1 regulatory subunit 3A                         | Regulation of PP1 in muscle                                          | 53.51%                           |
| <i>PSCD2</i><br>( <i>CYTH2</i> )      | cytohesin 2                                                         | Activator of Arf-family small GTPases                                | 53.18%                           |
| <i>SLCO4A1</i>                        | solute carrier organic anion transporter family 4A1                 | Transport of organic anions                                          | 52.98%                           |
| <i>TM4SF5</i>                         | transmembrane 4 L six family member 5                               | Lysosomal arginine sensor. mTORC1 activator                          | 52.50%                           |
| <i>AIRE</i>                           | autoimmune regulator                                                | Transcription factor in T cell negative selection                    | 52.07%                           |
| <i>MCMDC1</i><br>( <i>MCM9</i> )      | minichromosome maintenance 9 homologous recombination repair factor | Repair of double-stranded DNA breaks and DNA interstrand cross-links | 51.30%                           |
| <i>TDRD3</i>                          | tudor domain containing 3                                           | Methylarginine recognition                                           | 50.62%                           |
| <i>DRD4</i>                           | dopamine receptor D4                                                | Dopamine receptor in many processes                                  | 50.11%                           |

**Supplemental Table 3: Top hits from deconvolution screen**

| <b>Symbol</b>  | <b>Name</b>                                                         | <b>Function</b>                                    | <b>% Dharmacon siRNA<br/>(Total = 4)</b> | <b>% Invitrogen siRNA<br/>(Total = 3)</b> |
|----------------|---------------------------------------------------------------------|----------------------------------------------------|------------------------------------------|-------------------------------------------|
| <i>ATP1A1</i>  | ATPase Na <sup>+</sup> /K <sup>+</sup> transporting subunit alpha 1 | Component of ion pump                              | 100%                                     | 100%                                      |
| <i>KCNN4</i>   | potassium calcium-activated channel subfamily N member 4            | Component of ion channel                           | 100%                                     | 67%                                       |
| <i>NICN1</i>   | nicotin 1                                                           | Nuclear protein of unknown function                | 50%                                      | 100%                                      |
| <i>SAMD4A</i>  | sterile alpha motif domain containing 4                             | RNA-binding post-transcriptional regulator         | 75%                                      | 67%                                       |
| <i>SPG7</i>    | SPG7 matrix AAA peptidase subunit, paraplegin                       | Mitochondrial metalloprotease (AAA protein family) | 50%                                      | 100%                                      |
| <i>ARSI</i>    | arylsulfatase I                                                     | Hydrolysis of sulfate esters                       | 75%                                      | 33%                                       |
| <i>CSPP1</i>   | centrosome and spindle pole associated protein 1                    | Cell-cycle progression; cilia formation            | 75%                                      | 33%                                       |
| <i>ADGRF1</i>  | adhesion G protein-coupled receptor F1                              | Adhesion-GPCR involved in brain development        | 50%                                      | 67%                                       |
| <i>KCNQ2</i>   | potassium voltage-gated channel subfamily Q member 2                | Component of ion channel                           | 75%                                      | 33%                                       |
| <i>SYS1</i>    | SYS1 golgi trafficking protein                                      | Targeting of ARFRP1 to the Golgi apparatus         | 75%                                      | 33%                                       |
| <i>RAB40AL</i> | Ras-related protein Rab-40A-like                                    | Protein targeting for proteasomal degradation      | 75%                                      | 0%                                        |
| <i>THBS3</i>   | thrombospondin 3                                                    | Cell-to-cell, cell-to-matrix interactions          | 75%                                      | 0%                                        |
| <i>TRPT1</i>   | tRNA 2'-phosphotransferase 1                                        | tRNA splicing                                      | 75%                                      | 0%                                        |

Full unedited gels for Figure 1A

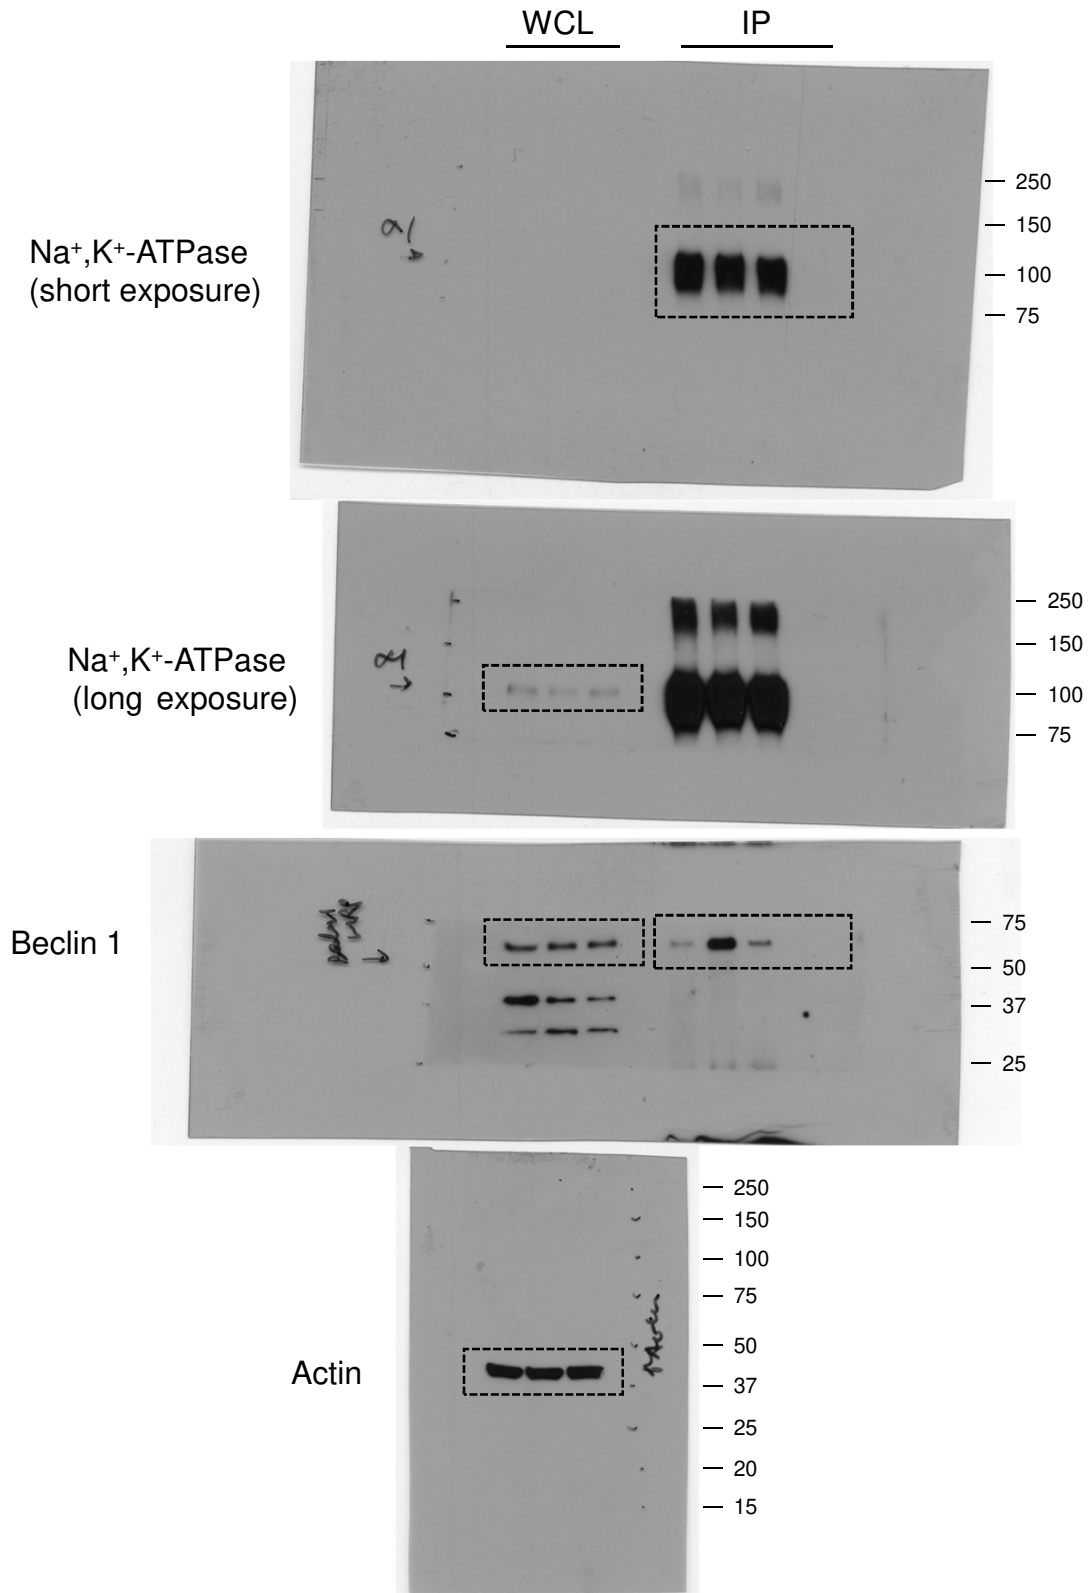

Full unedited gels for Figure 2A

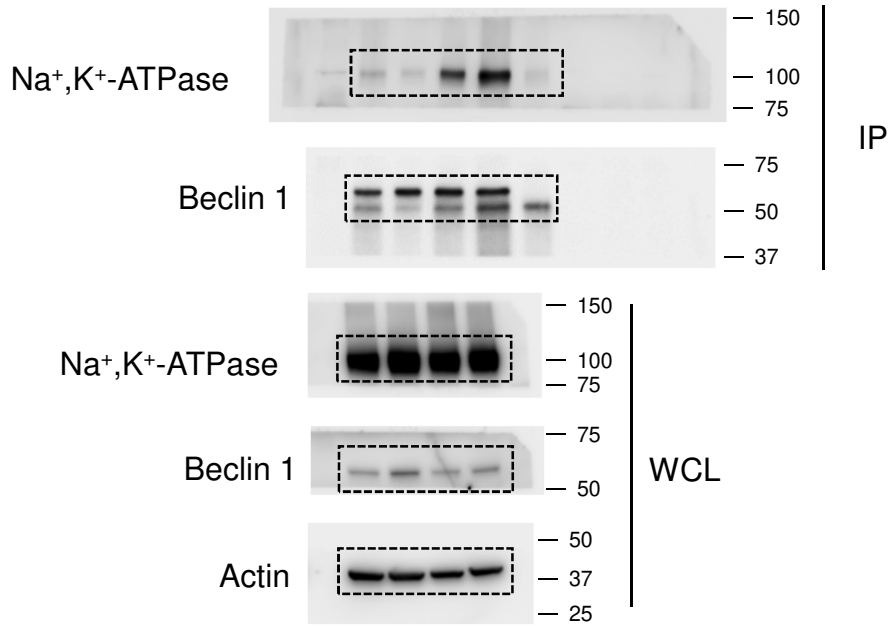

Full unedited gels for Figure 2C

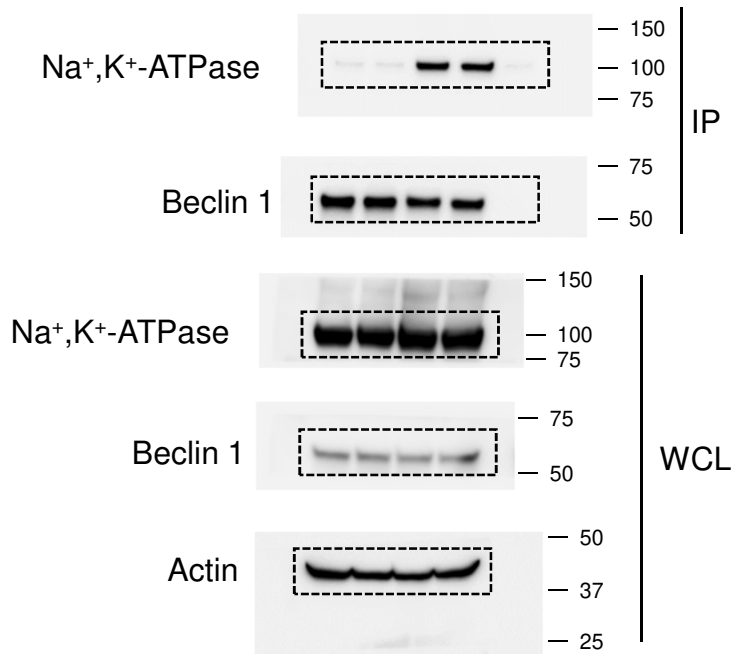



Full unedited gels for Figure 3A

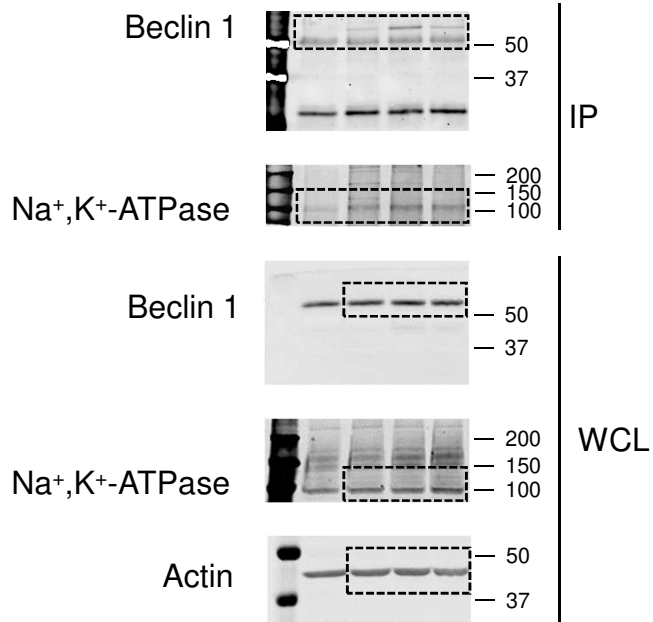

Full unedited gels for Figure 3E

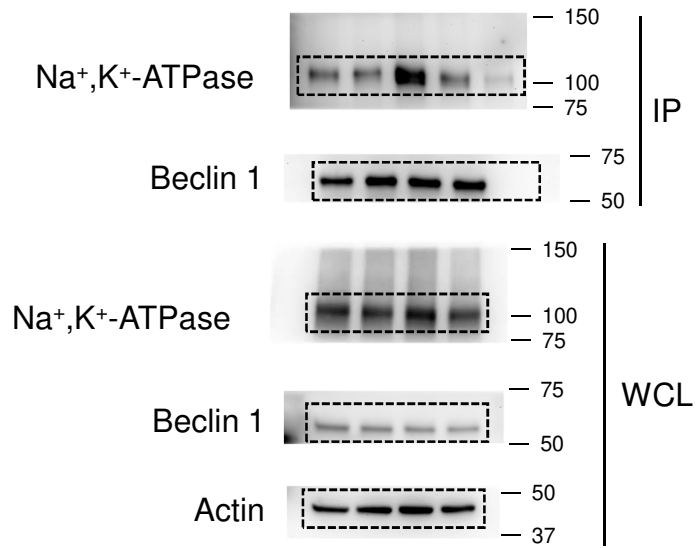

Full unedited gels for Figure 5A

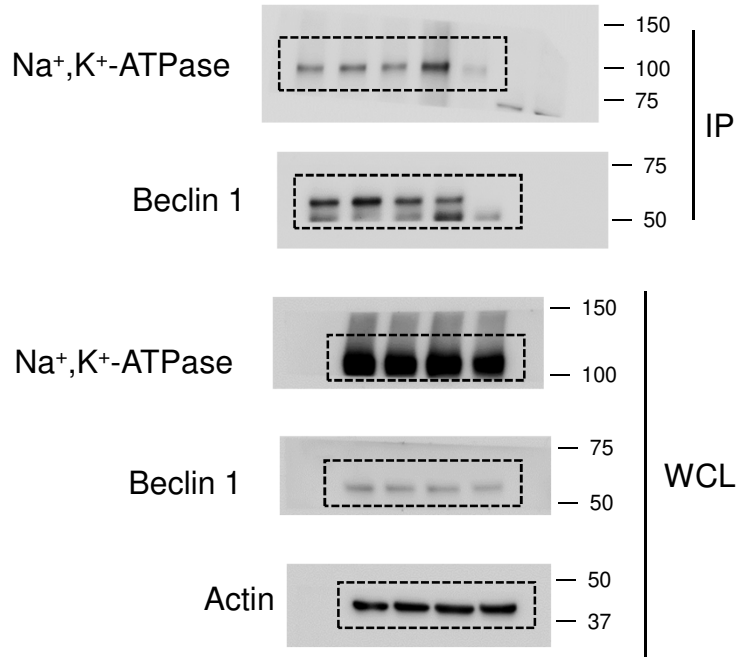

Full unedited gels for Supplemental Figure 2A

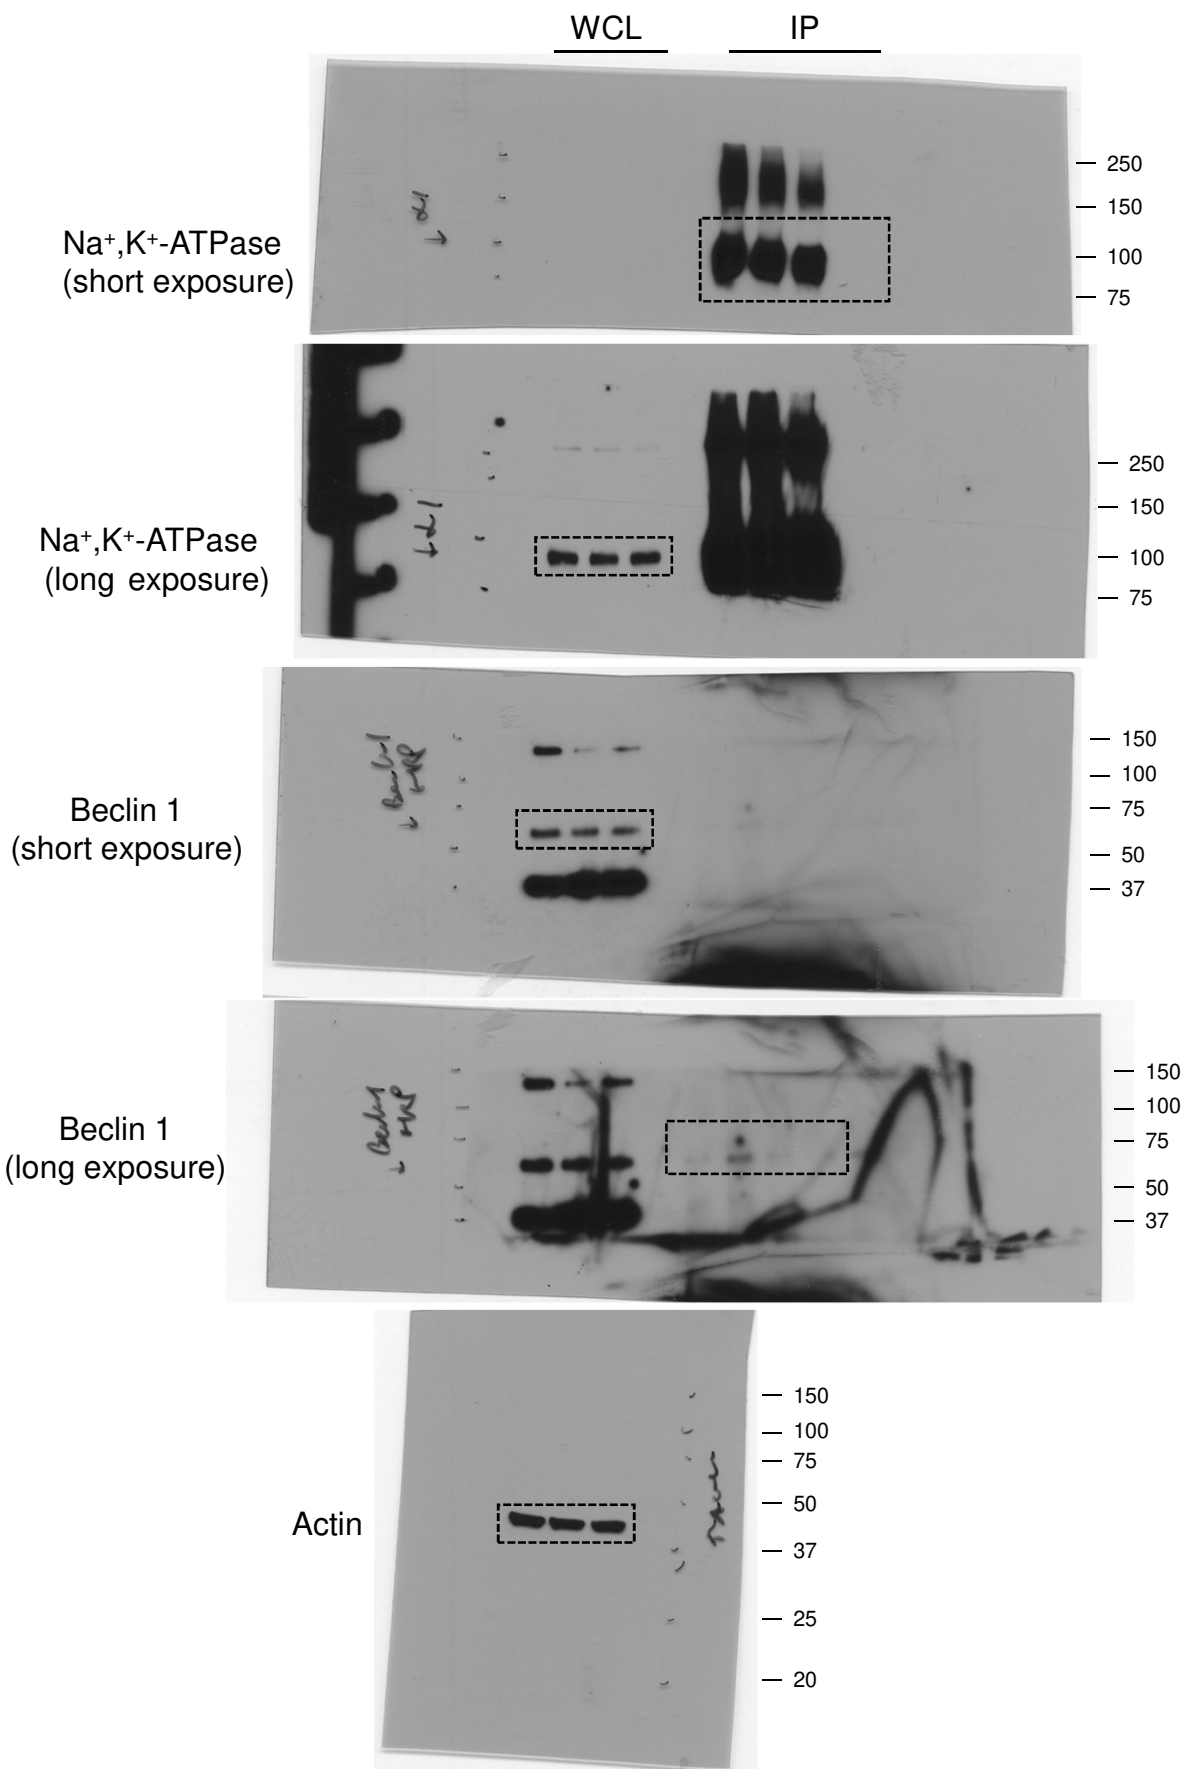

Supplement: jciinsight-5-133282-s176.pdf [file jciinsight-5-133282-s176.pdf]
